# Supplementary material for: TRAF1 Exacerbates Myocardial Ischemia Reperfusion Injury via ASK1–JNK/p38 Signaling
Source: PubMed Central journal article supplement — J Am Heart Assoc. 2019 Oct 25;8(21):e012575. doi: 10.1161/JAHA.119.012575 (PMC6898833; doi:10.1161/jaha.119.012575), 2019-10-25

# **SUPPLEMENTAL MATERIAL**

Figure S1. Example images for haemodynamic measurements in Sham and I/R group.

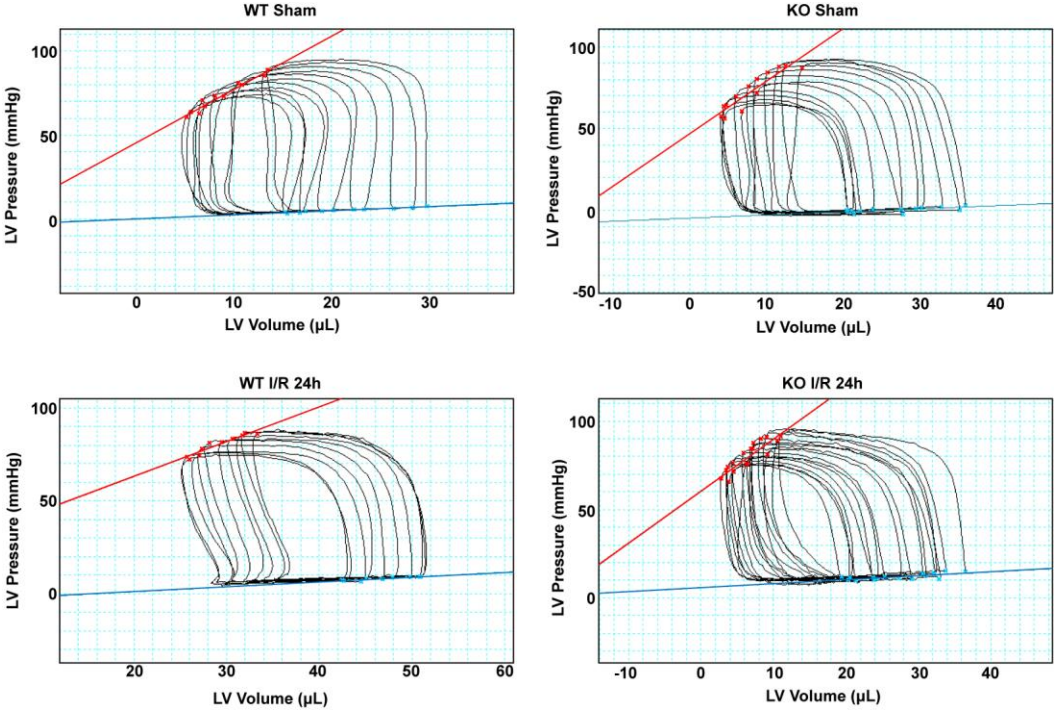

Figure S2. Relative mRNA levels of macrophage marker molecules, including CD38, Gpr18, Fpr2, Egr2 and c-Myc in the indicated groups (n=4 per group).

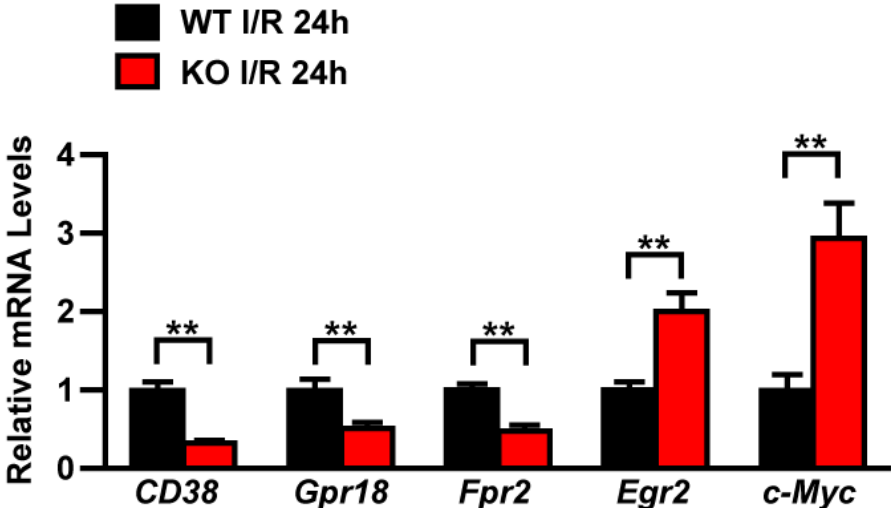

Supplement: JAH3-8-e012575-s001.pdf [file JAH3-8-e012575-s001.pdf]
